# Supplementary material for: Distinct mechanisms of microRNA sorting into cancer cell-derived extracellular vesicle subtypes
Source: eLife journal article supplement (doi:10.7554/elife.47544), 2019-08-22
Supplement: supp [file elife-47544-supp-v1.zip]

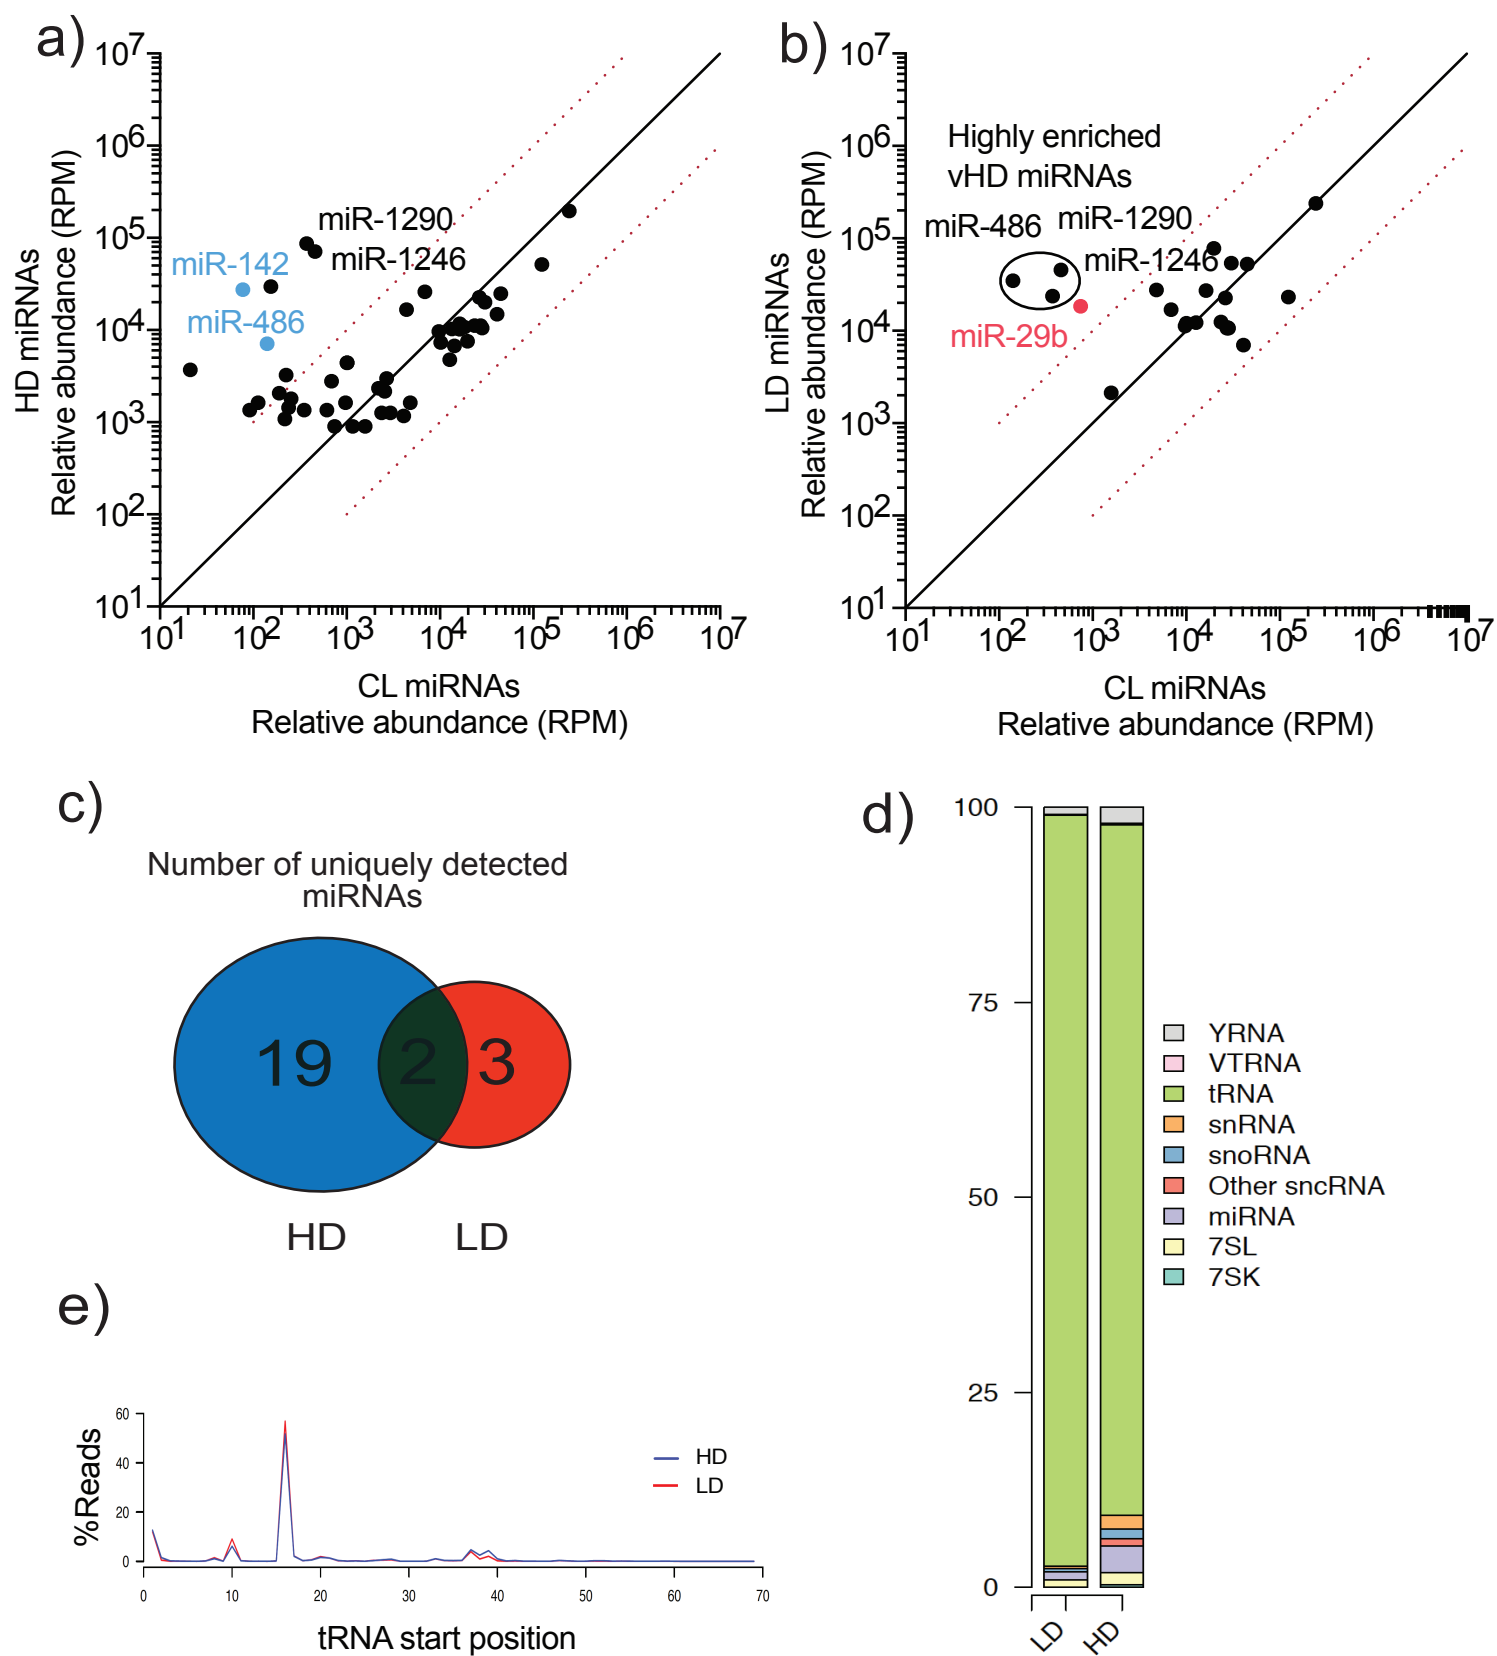

Figure 3 - figure supplement 2. TGIRT-sequencing of high buoyant density and low buoyant density EV sub-populations.
