# Supplementary material for: Distinct mechanisms of microRNA sorting into cancer cell-derived extracellular vesicle subtypes
Source: eLife journal article supplement (doi:10.7554/elife.47544), 2019-08-22
Supplement: supp [file elife-47544-supp-v1.zip]

Archive with 16 entries (16 files):
- elife_poa_e47544_Figure_7_figure_supplement_1.pdf
- elife_poa_e47544_Figure_4_figure_supplement_2.pdf
- elife_poa_e47544_Figure_3_figure_supplement_3.pdf
- elife_poa_e47544_Figure_3_figure_supplement_1.pdf
- elife_poa_e47544_Figure_7_figure_supplement_2.pdf
- elife_poa_e47544_Figure_1_figure_supplement_1_source_data_1.xlsx
- elife_poa_e47544_Figure_6_figure_supplement_1.pdf
- elife_poa_e47544_Figure_4_figure_supplement_1.pdf
- elife_poa_e47544_Figure_3_figure_supplement_4.pdf
- elife_poa_e47544_Figure_1_figure_supplement_1.pdf
- elife_poa_e47544_Figure_8_figure_supplement_1.pdf
- elife_poa_e47544_Figure_5_figure_supplement_1.pdf
- elife_poa_e47544_Figure_7_figure_supplement_3.pdf
- elife_poa_e47544_Figure_2_source_data_1.xlsx
- elife_poa_e47544_Figure_3_figure_supplement_2.pdf
- elife_poa_e47544_Transparent_Reporting_File.docx
