# Supplementary material for: Distinct mechanisms of microRNA sorting into cancer cell-derived extracellular vesicle subtypes
Source: eLife journal article supplement (doi:10.7554/elife.47544), 2019-08-22
Supplement: supp [file elife-47544-supp-v1.zip › elife_poa_e47544_Figure_1_figure_supplement_1_source_data_1.xlsx]

## Sheet: Sheet1
Fraction	Refraction Index	Density g/ml
1	1.344	1.0359
2	1.347	1.04595			*In red, fractions indicating the low density EV sub-population.
3	1.35	1.056
4	1.3515	1.06102			*In blue, fractions indicating the high density EV sub-population.
5	1.353	1.06605
6	1.356	1.0761			*In green, fractions at the bottom. Refraction index (and density) plateaus after fraction 25.
7	1.358	1.0828
8	1.359	1.08615
9	1.361	1.09285	*
10	1.364	1.1029
11	1.366	1.1096
12	1.3705	1.12468
13	1.372	1.1297
14	1.374	1.1364
15	1.377	1.14645	*
16	1.3795	1.15482
17	1.3815	1.16153
18	1.384	1.1699
19	1.3865	1.17828
20	1.391	1.19335
21	1.3945	1.20508
22	1.3985	1.21848
23	1.4015	1.22853
24	1.4025	1.23188
25	1.405	1.24025
26	1.405	1.24025	*
27	1.405	1.24025
28	1.407	1.24695
28	1.407	1.24695
30	1.409	1.25365
31	1.413	1.26705
