# Supplementary material for: Distinct mechanisms of microRNA sorting into cancer cell-derived extracellular vesicle subtypes
Source: eLife journal article supplement (doi:10.7554/elife.47544), 2019-08-22
Supplement: supp [file elife-47544-supp-v1.zip › elife_poa_e47544_Figure_2_source_data_1.xlsx]

## Sheet: HD
HD detected proteins	Spectrum count	Unique peptides	coverage
thioredoxin isoform 2	3	2	0.259
annexin A2 isoform 2	12	7	0.245
protein S100-A8	3	2	0.237
ADP-ribosylation factor 1	10	4	0.232
guanine nucleotide-binding protein G(I)/G(S)/G(O) subunit gamma-12 precursor	2	1	0.222
histone H4	5	2	0.214
pyruvate kinase PKM isoform d	15	8	0.212
HLA class I histocompatibility antigen, A-2 alpha chain isoform X3	10	7	0.205
polyubiquitin-B precursor	6	4	0.205
14-3-3 protein zeta/delta	4	3	0.2
cornifin-B	1	1	0.191
alpha-enolase isoform 1	12	8	0.189
60S ribosomal protein L22 proprotein	2	2	0.188
galectin-7	8	2	0.184
lactadherin isoform a preproprotein	8	6	0.183
actin, cytoplasmic 2	15	9	0.179
ras-related protein Rap-1b isoform 2	3	2	0.162
tetranectin precursor	5	3	0.158
glyceraldehyde-3-phosphate dehydrogenase isoform 2	7	3	0.154
guanine nucleotide-binding protein G(I)/G(S)/G(T) subunit beta-1 isoform 1	7	4	0.153
protein S100-A11	1	1	0.152
transgelin-2 isoform b	3	3	0.151
tubulin beta chain	11	11	0.149
heat shock cognate 71 kDa protein isoform 2	14	7	0.142
ras-related protein Rab-7a	2	2	0.13
sodium/potassium-transporting ATPase subunit alpha-1 isoform a	17	11	0.128
ATP synthase subunit beta, mitochondrial precursor	9	6	0.127
syntenin-1 isoform 1	4	2	0.124
ras-related protein R-Ras precursor	2	2	0.124
rab GDP dissociation inhibitor beta isoform 2	5	3	0.122
rho-related GTP-binding protein RhoC precursor	3	2	0.119
histone H2B type 1-D	6	2	0.119
annexin A5	5	3	0.116
ras-related protein Rap-2b	3	2	0.115
profilin-1	2	1	0.114
PREDICTED: syntenin-1 isoform X1	4	2	0.113
chloride intracellular channel protein 1	3	2	0.112
L-lactate dehydrogenase B chain	3	3	0.111
peroxiredoxin-1	5	2	0.106
PREDICTED: HLA class I histocompatibility antigen, B-15 alpha chain isoform X1	3	3	0.105
ras-related protein Rab-5C isoform b	2	2	0.104
integrin beta-1 isoform 1A precursor	15	7	0.102
solute carrier family 2, facilitated glucose transporter member 1	10	5	0.102
integrin alpha-3 isoform a precursor	23	10	0.101
guanine nucleotide-binding protein G(i) subunit alpha-2 isoform 2	5	2	0.101
PREDICTED: HLA class I histocompatibility antigen, B-18 alpha chain isoform X1	3	3	0.1
tubulin alpha-1C chain	3	3	0.096
junction plakoglobin	12	5	0.09
heat shock 70 kDa protein 1A/1B	8	4	0.087
CD44 antigen isoform 6 precursor	6	3	0.086
proteolipid protein 2	1	1	0.086
integrin alpha-6 isoform a precursor	9	7	0.085
heat shock protein beta-1	1	1	0.083
desmoplakin isoform I	30	19	0.078
annexin A1	6	2	0.078
tissue factor isoform 1 precursor	2	2	0.078
moesin	5	3	0.075
claudin-9	2	1	0.074
ras-related C3 botulinum toxin substrate 2	2	1	0.073
ezrin	7	3	0.072
histone H2A type 1-B/E	1	1	0.069
ras-related protein Rab-23	1	1	0.068
CD81 antigen	1	1	0.068
ras-related protein Rab-8A	3	1	0.068
hemoglobin subunit gamma-1	3	1	0.068
electron transfer flavoprotein subunit alpha, mitochondrial isoform b	2	1	0.067
antithrombin-III precursor	6	3	0.065
heat shock 70 kDa protein 1-like	8	3	0.064
hemoglobin subunit alpha	4	2	0.063
CD59 glycoprotein preproprotein	2	1	0.062
5'-nucleotidase isoform 2 preproprotein	6	2	0.061
ephrin type-A receptor 2 precursor	7	5	0.06
ras-related protein Rab-11B	1	1	0.06
guanine nucleotide-binding protein subunit alpha-13 isoform 1	4	2	0.058
L-lactate dehydrogenase A chain isoform 3	2	2	0.058
thrombospondin-1 precursor	8	6	0.057
myristoylated alanine-rich C-kinase substrate	1	1	0.057
14-3-3 protein gamma	1	1	0.057
14-3-3 protein theta	1	1	0.057
arginase-1 isoform 2	1	1	0.056
ras-related protein Rab-10	2	1	0.055
peptidyl-prolyl cis-trans isomerase A	1	1	0.055
ras-related protein Ral-A precursor	2	1	0.053
IST1 homolog isoform a	1	1	0.052
F-actin-capping protein subunit alpha-1	2	1	0.052
cell division control protein 42 homolog isoform 1 precursor	1	1	0.052
serum albumin preproprotein	51	4	0.051
sodium/potassium-transporting ATPase subunit beta-3	2	1	0.05
integrin alpha-2 precursor	6	4	0.049
14-3-3 protein beta/alpha	2	1	0.049
thyroxine-binding globulin precursor	3	2	0.048
plakophilin-1 isoform 1a	5	3	0.047
malate dehydrogenase, mitochondrial isoform 1 precursor	1	1	0.047
glutathione S-transferase omega-1 isoform 3	2	1	0.047
sodium/potassium-transporting ATPase subunit beta-1	1	1	0.046
desmoglein-1 preproprotein	7	3	0.044
flotillin-1	1	1	0.044
cathepsin D preproprotein	1	1	0.044
40S ribosomal protein SA	1	1	0.044
EH domain-containing protein 1 isoform 1	2	2	0.043
neutral amino acid transporter B(0) isoform 1	6	2	0.043
lamin isoform A	3	2	0.042
guanine nucleotide-binding protein G(k) subunit alpha	2	1	0.042
triosephosphate isomerase isoform 2	1	1	0.042
gelsolin isoform b	3	2	0.041
THAP domain-containing protein 6	2	1	0.041
PREDICTED: alpha-2-macroglobulin isoform X1	17	8	0.04
serpin B5	1	1	0.04
peroxiredoxin-6	1	1	0.04
platelet-activating factor acetylhydrolase IB subunit beta isoform a	1	1	0.039
PREDICTED: integrin beta-4 isoform X1	10	5	0.038
60 kDa heat shock protein, mitochondrial	1	1	0.037
junctional adhesion molecule A precursor	1	1	0.037
CD151 antigen	4	1	0.036
alpha-2-HS-glycoprotein preproprotein	2	1	0.035
corneodesmosin precursor; S protein; differentiated keratinocyte S protein precursor	3	1	0.034
C-C chemokine receptor-like 2 isoform 2	1	1	0.034
4F2 cell-surface antigen heavy chain isoform b	3	2	0.033
pigment epithelium-derived factor precursor	3	1	0.033
ATP synthase subunit alpha, mitochondrial isoform c	1	1	0.032
vitronectin precursor	2	1	0.031
glucose-6-phosphate isomerase isoform 2	1	1	0.03
elongation factor 1-gamma	1	1	0.03
programmed cell death 6-interacting protein isoform 1	2	2	0.029
plasma membrane calcium-transporting ATPase 1 isoform 1b	3	2	0.028
large neutral amino acids transporter small subunit 1	1	1	0.028
serpin B4	2	1	0.028
obg-like ATPase 1 isoform 1	2	1	0.028
heat shock protein HSP 90-alpha isoform 1	3	2	0.027
EGF-like repeat and discoidin I-like domain-containing protein 3 isoform 1 precursor	2	1	0.025
prothrombin preproprotein	1	1	0.024
elongation factor 1-alpha 1	1	1	0.024
alpha-2-antiplasmin isoform a precursor	2	1	0.022
transferrin receptor protein 1	1	1	0.021
serpin B12	2	1	0.02
serotransferrin precursor	2	1	0.019
low affinity cationic amino acid transporter 2 isoform 3	1	1	0.019
integrin alpha-5 precursor	1	1	0.018
zinc finger protein GLIS3 isoform a	1	1	0.018
niban-like protein 1 isoform 1	1	1	0.017
inter-alpha-trypsin inhibitor heavy chain H2 precursor	1	1	0.016
PREDICTED: GRAM domain-containing protein 4 isoform X1	1	1	0.015
pregnancy zone protein precursor	16	2	0.014
puromycin-sensitive aminopeptidase	1	1	0.014
neuropilin-1 isoform a precursor	1	1	0.014
lactotransferrin isoform 2	2	1	0.014
alpha-actinin-4	4	1	0.013
hornerin	5	2	0.011
ras GTPase-activating-like protein IQGAP1	2	1	0.011
protein GNAS isoform XLas	1	1	0.01
myosin-9	1	1	0.007
coagulation factor V precursor	2	1	0.006
plexin-B2 precursor	2	1	0.006
filaggrin-2	1	1	0.005
epiplakin	1	1	0.004

## Sheet: LD
LD detected proteins	Spectrum count	Unique peptides	coverage
glyceraldehyde-3-phosphate dehydrogenase isoform 2	9	4	0.205
hemoglobin subunit beta	7	2	0.197
hemoglobin subunit alpha	9	3	0.169
annexin A2 isoform 2	7	4	0.139
BPI fold-containing family A member 1 precursor	3	2	0.113
tubulin polymerization-promoting protein family member 2	1	1	0.112
thioredoxin isoform 2	1	1	0.106
tetranectin precursor	1	1	0.104
prolactin-inducible protein precursor	2	1	0.103
zymogen granule protein 16 homolog B precursor	1	1	0.101
lactadherin isoform a preproprotein	3	3	0.093
peroxiredoxin-2	2	1	0.086
serum albumin preproprotein	114	1	0.082
integrin beta-1 isoform 1A precursor	6	7	0.081
lysozyme C precursor	2	5	0.081
ATP synthase subunit beta, mitochondrial precursor	8	1	0.072
histone H2A type 1-B/E	1	4	0.069
pyruvate kinase PKM isoform c	5	1	0.068
electron transfer flavoprotein subunit alpha, mitochondrial isoform b	3	3	0.067
pigment epithelium-derived factor precursor	4	2	0.062
5'-nucleotidase isoform 2 preproprotein	4	2	0.061
neutral amino acid transporter B(0) isoform 1	2	2	0.061
apolipoprotein A-I preproprotein	3	1	0.06
desmoglein-1 preproprotein	5	4	0.058
78 kDa glucose-regulated protein precursor	3	2	0.05
peroxiredoxin-1	2	1	0.05
sodium/potassium-transporting ATPase subunit alpha-1 isoform a	7	4	0.048
guanine nucleotide-binding protein G(i) subunit alpha-2 isoform 2	2	1	0.047
cathepsin D preproprotein	1	1	0.044
gelsolin isoform b	4	2	0.041
tubulin alpha-1C chain	3	1	0.04
serpin B12	2	1	0.04
4F2 cell-surface antigen heavy chain isoform b	3	2	0.038
retinoic acid-induced protein 3	2	1	0.036
corneodesmosin precursor; S protein; differentiated keratinocyte S protein precursor	2	1	0.034
junction plakoglobin	5	3	0.032
vitronectin precursor	2	1	0.031
adenosylhomocysteinase isoform 2	4	1	0.03
inter-alpha-trypsin inhibitor heavy chain H2 precursor	4	2	0.027
tubulin beta-4A chain isoform 3	2	1	0.027
glyceraldehyde-3-phosphate dehydrogenase, testis-specific	2	1	0.027
desmoplakin isoform I	7	5	0.026
WD repeat-containing protein 1 isoform 1	1	1	0.026
ATP synthase subunit alpha, mitochondrial isoform b precursor	12	1	0.024
elongation factor 1-alpha 1	4	1	0.024
zinc finger protein 616	1	1	0.023
protein-glutamine gamma-glutamyltransferase E	2	1	0.023
thrombospondin-1 precursor	3	2	0.021
plakophilin-1 isoform 1a	1	1	0.021
PREDICTED: alpha-2-macroglobulin isoform X1	6	3	0.02
periostin isoform 1 precursor	2	1	0.019
antithrombin-III precursor	3	1	0.019
ligand-dependent nuclear receptor corepressor-like protein isoform 1	1	1	0.018
sulfhydryl oxidase 1 isoform a precursor	1	1	0.017
procollagen galactosyltransferase 2 precursor	1	1	0.016
pregnancy zone protein precursor	4	2	0.014
integrin alpha-6 isoform a precursor	1	1	0.014
complement C3 precursor	2	1	0.012
integrin alpha-3 isoform a precursor	2	1	0.009
