# Supplementary figures and images for: Distinct mechanisms of microRNA sorting into cancer cell-derived extracellular vesicle subtypes
Source: eLife journal article supplement (doi:10.7554/elife.47544), 2019-08-22

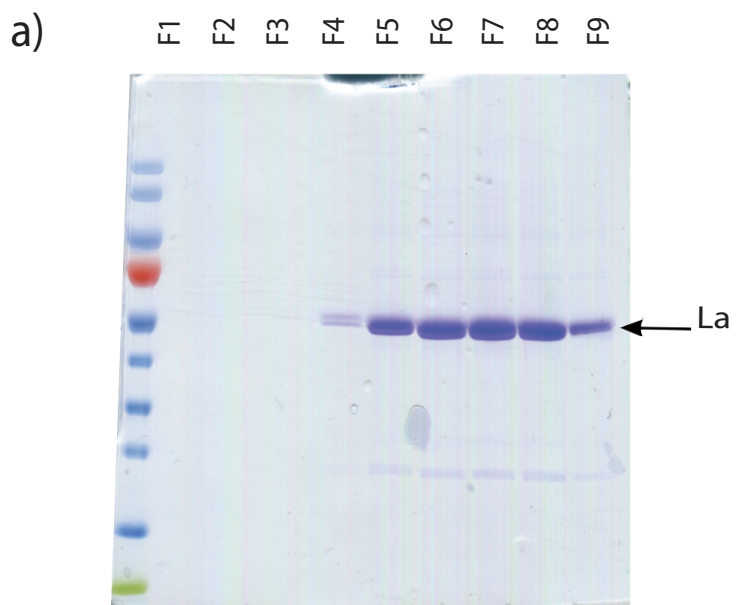

Figure 5 - figure supplement 1. Purification of heterologously expressed La.

Supplement: supp [file elife-47544-supp-v1.zip]

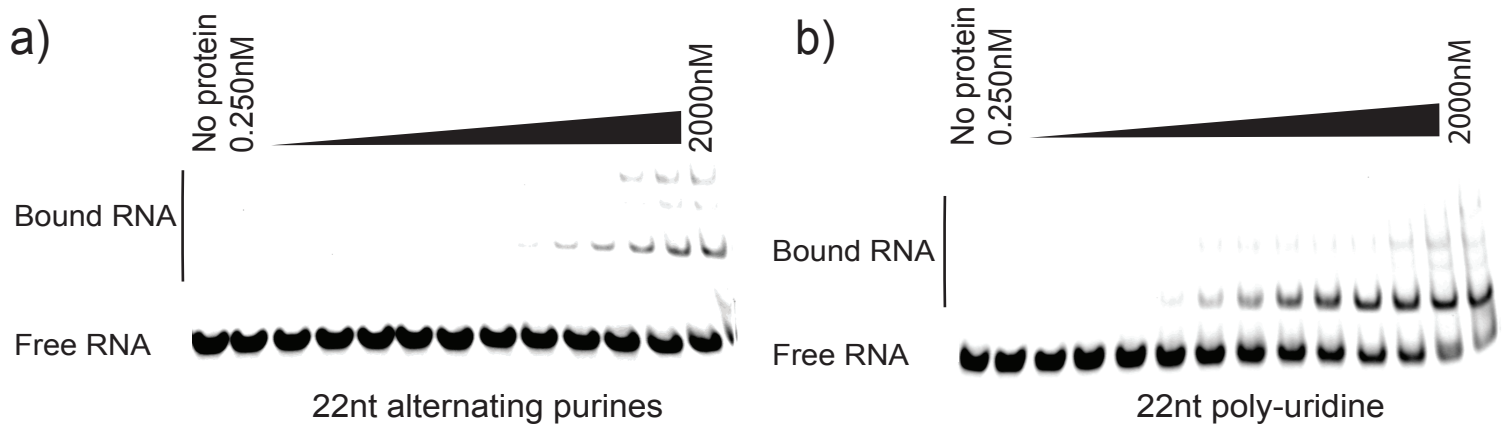

Figure 7 - figure supplement 3. Controls for La specificity during EMSA.

Supplement: supp [file elife-47544-supp-v1.zip]

a)

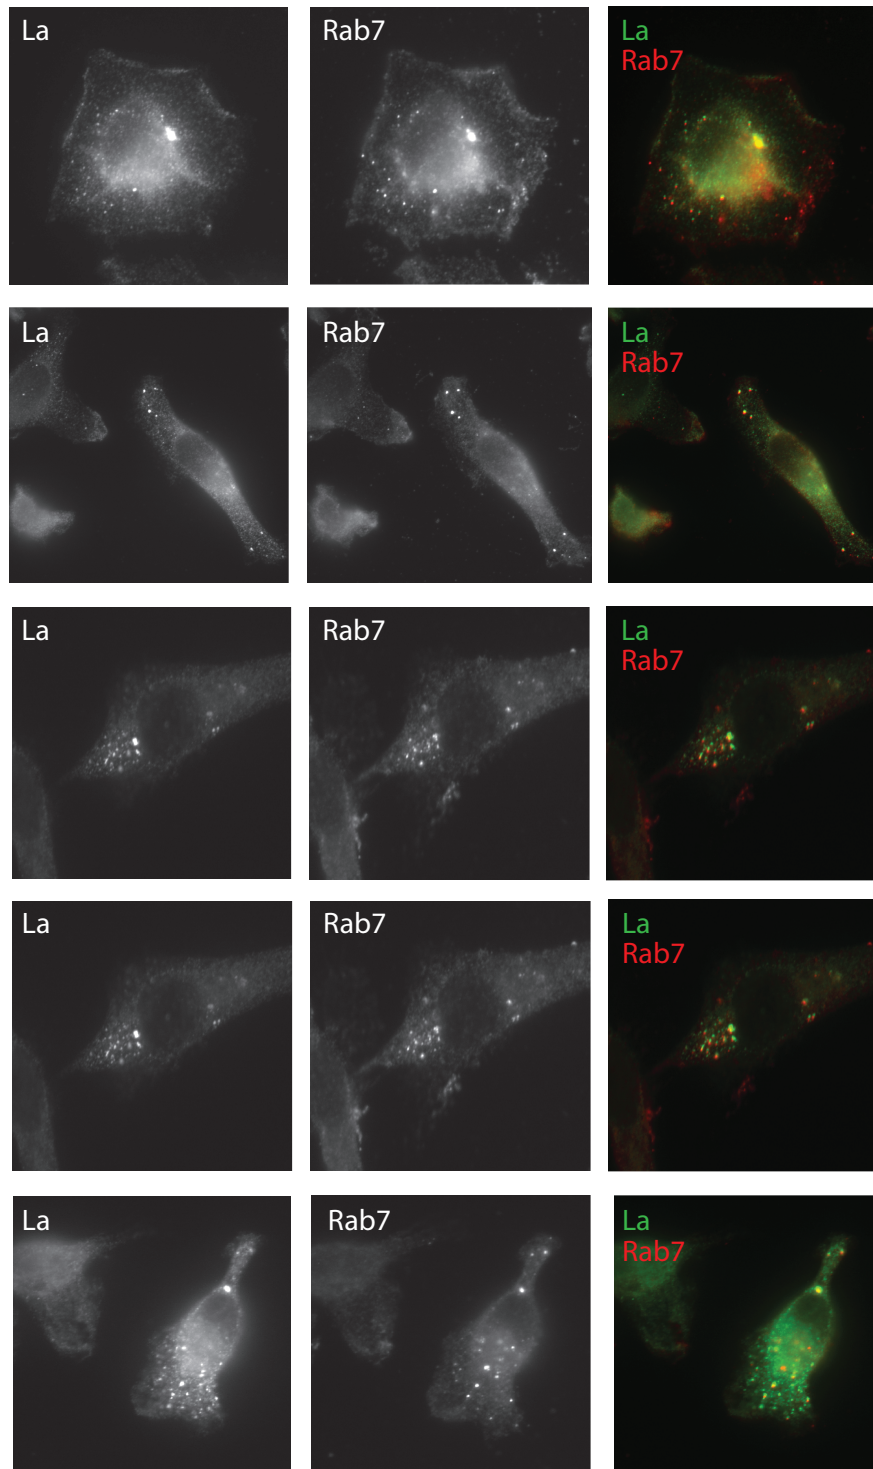

b)

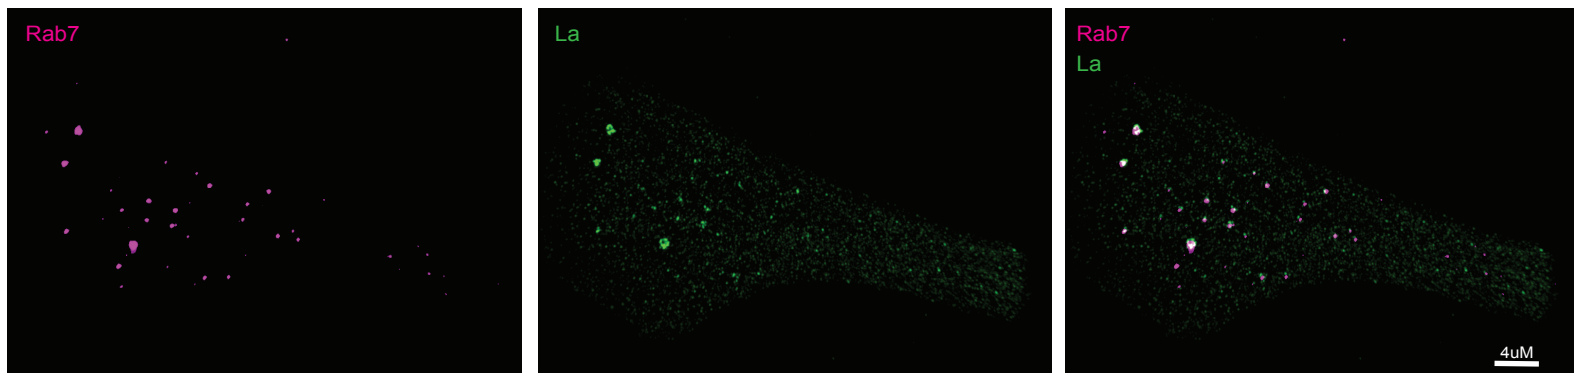

Figure 7 – figure supplement 2. La associates with Rab7-positive vesicles.

Supplement: supp [file elife-47544-supp-v1.zip]

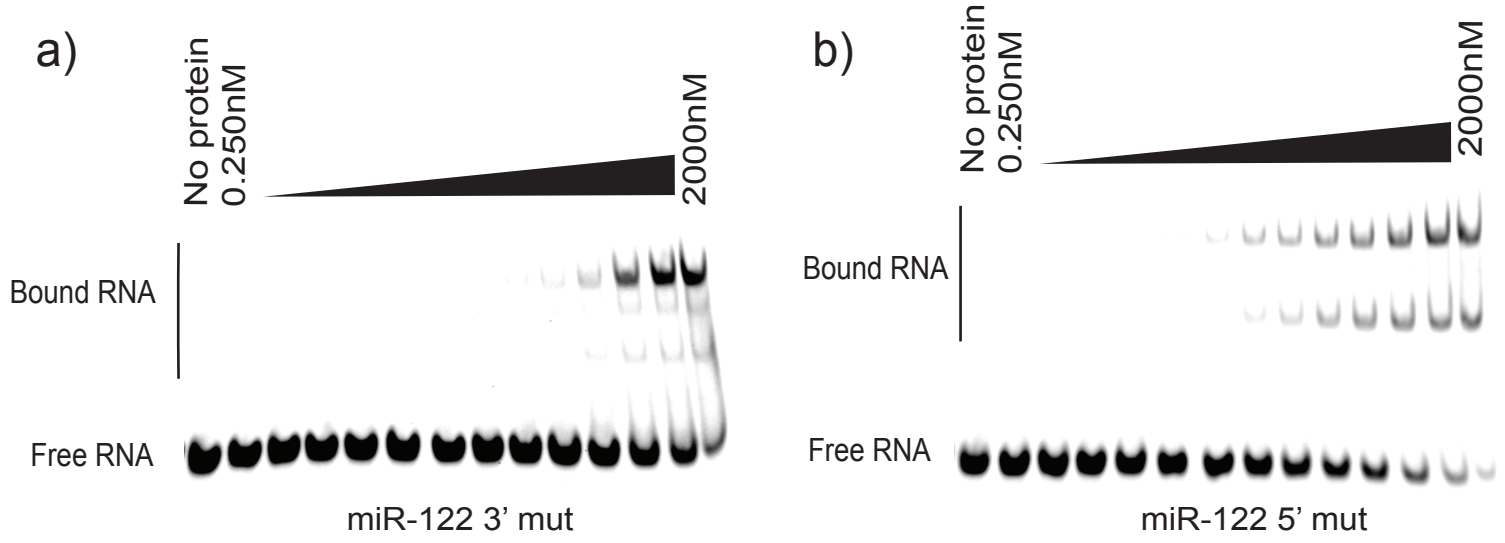

Figure 8 - figure supplement 1. EMSA for miR-122 mutated versions.

Supplement: supp [file elife-47544-supp-v1.zip]

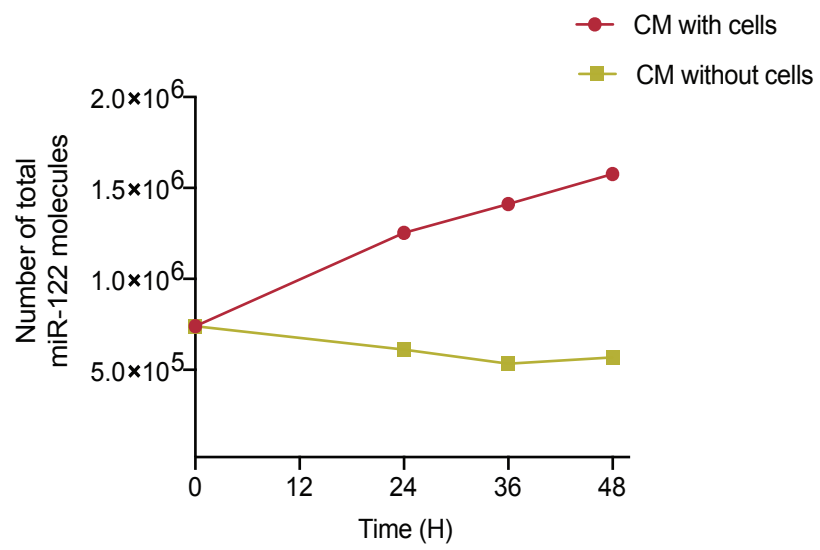

Figure 3 - figure supplement 3. MiR-122 accumulates in conditioned media over time.

Supplement: supp [file elife-47544-supp-v1.zip]

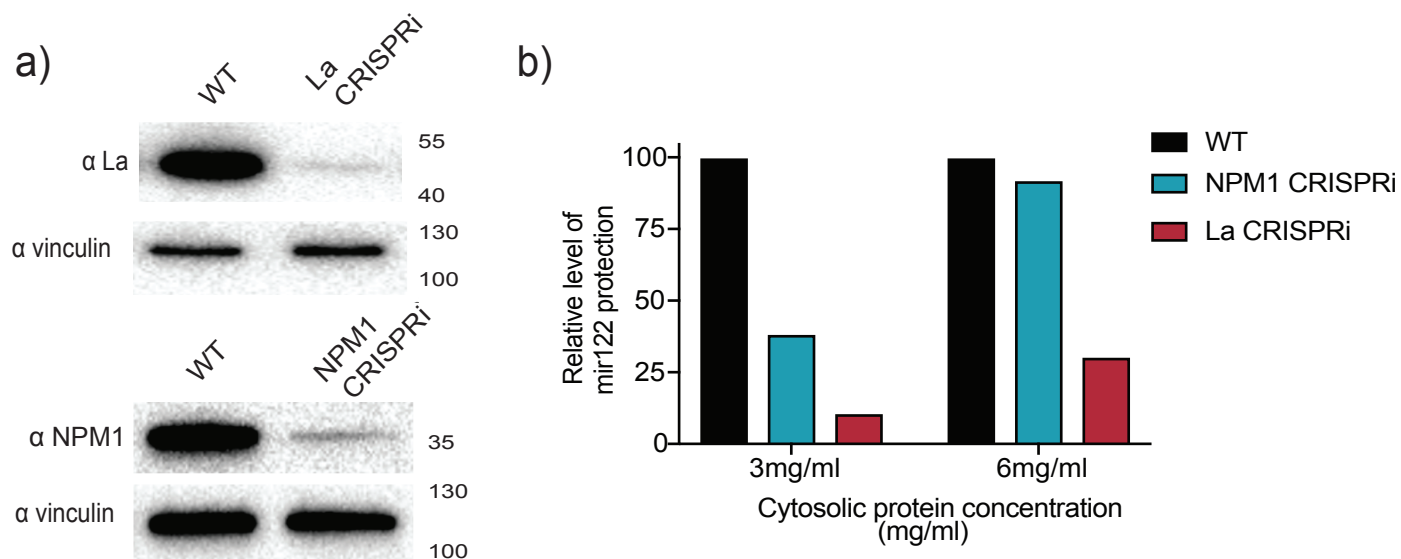

Figure 4 - figure supplement 2. CRISPRi efficiently depletes the RNA-binding protein candidates.

Supplement: supp [file elife-47544-supp-v1.zip]

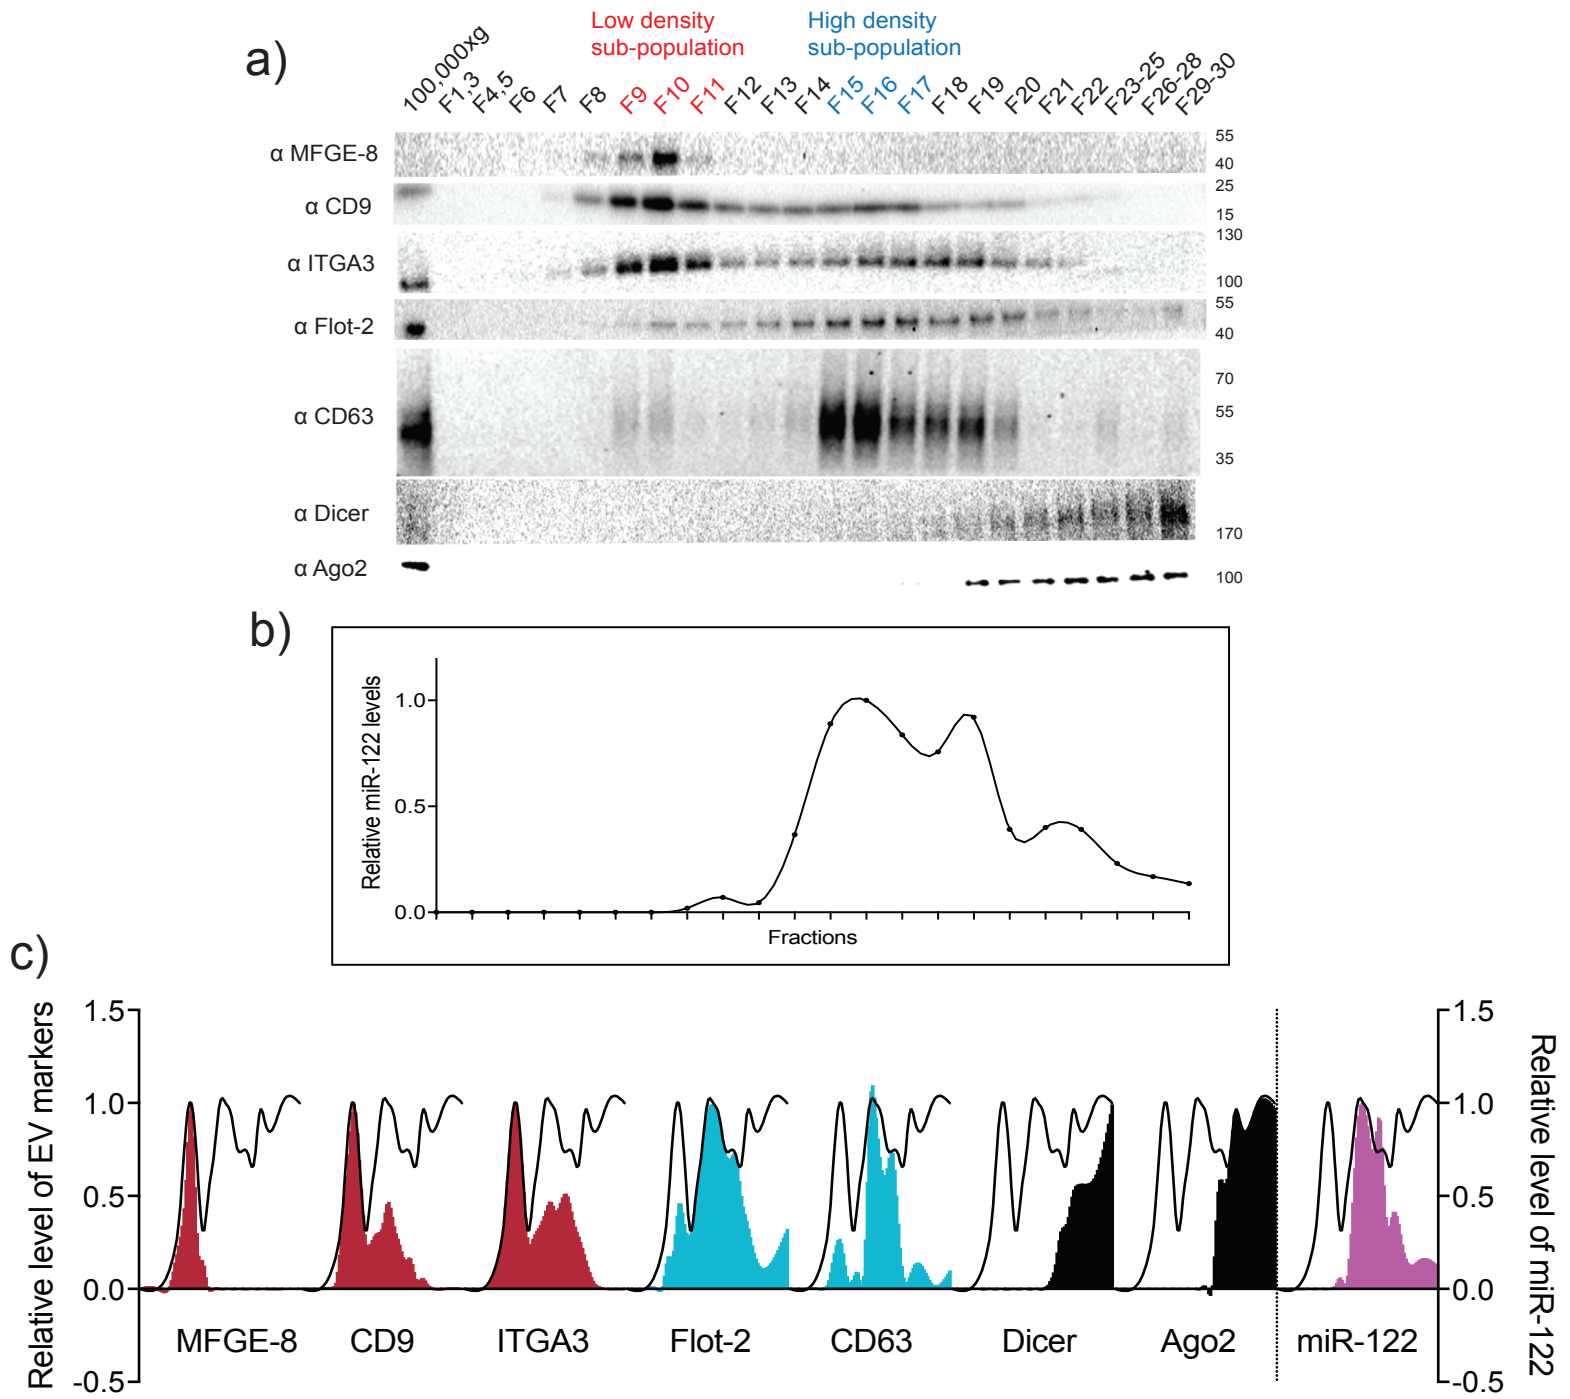

Supplement: supp [file elife-47544-supp-v1.zip]

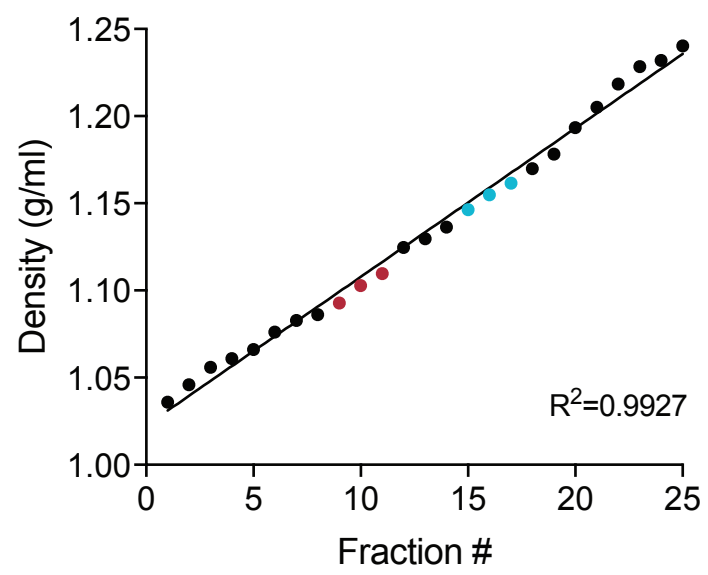

Figure 1 - figure supplement 1. Linearity of iodixanol density gradient.

Supplement: supp [file elife-47544-supp-v1.zip]

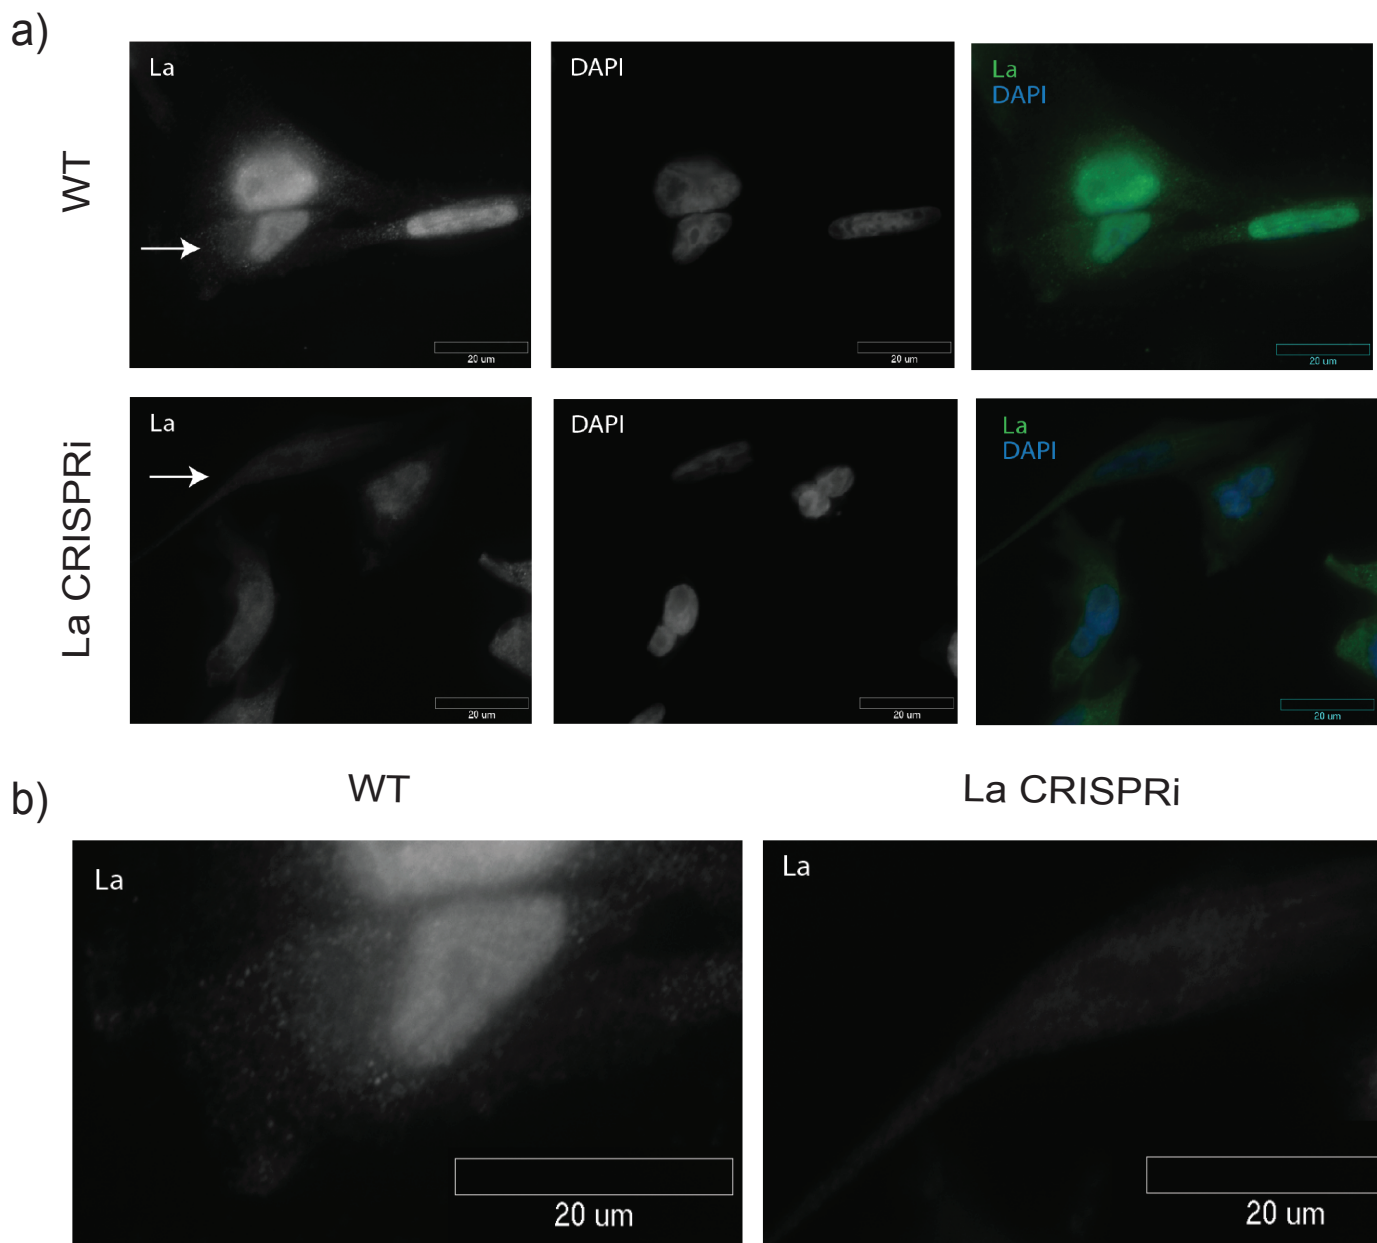

Figure 7 - figure supplement 1. Detection of nuclear and cytoplasmic La by immunofluorescence.

Supplement: supp [file elife-47544-supp-v1.zip › elife_poa_e47544_Figure_7_figure_supplement_1.pdf]

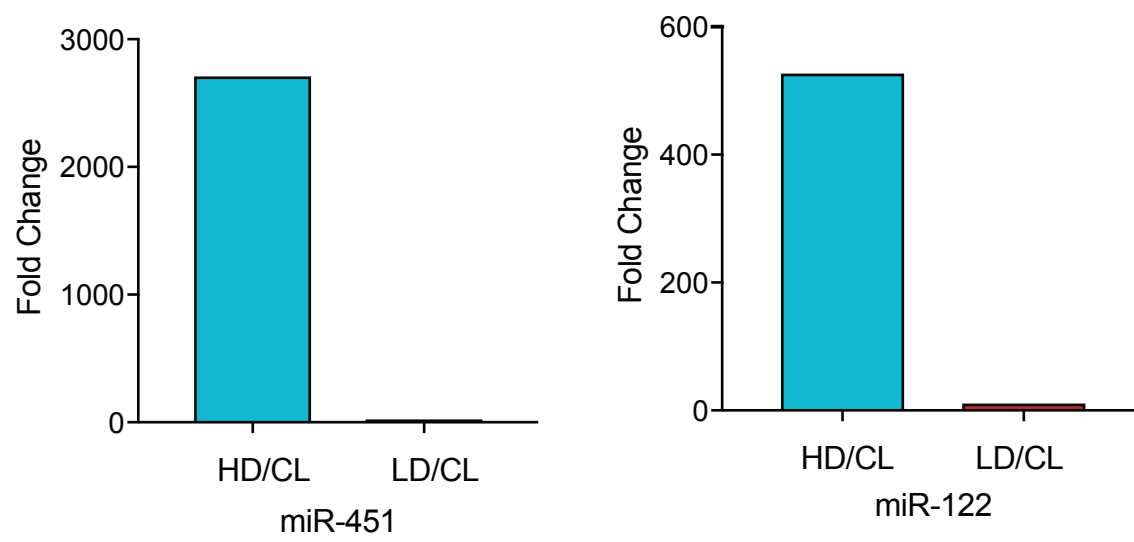

Figure 3 - figure supplement 1. MiR-122 and miR-451a are highly enriched in the vHD sub-population.

Supplement: supp [file elife-47544-supp-v1.zip › elife_poa_e47544_Figure_3_figure_supplement_1.pdf]

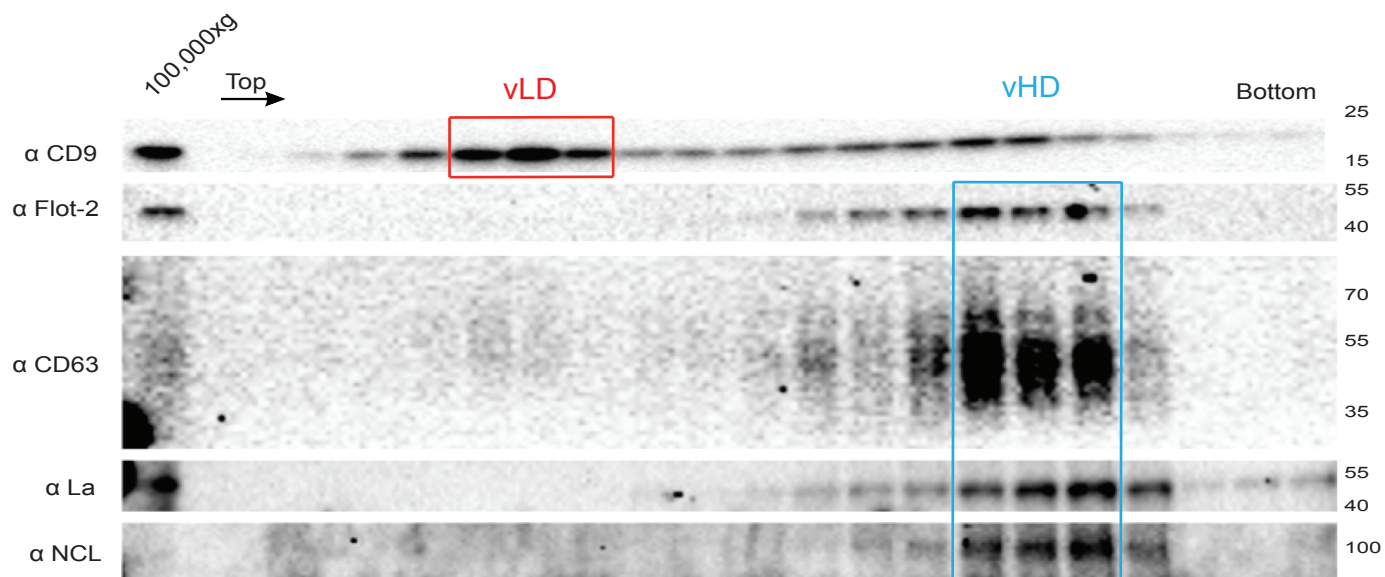

Figure 6 – figure supplement 1. The La protein co-fractionates with the vHD sub-population

Supplement: supp [file elife-47544-supp-v1.zip › elife_poa_e47544_Figure_6_figure_supplement_1.pdf]

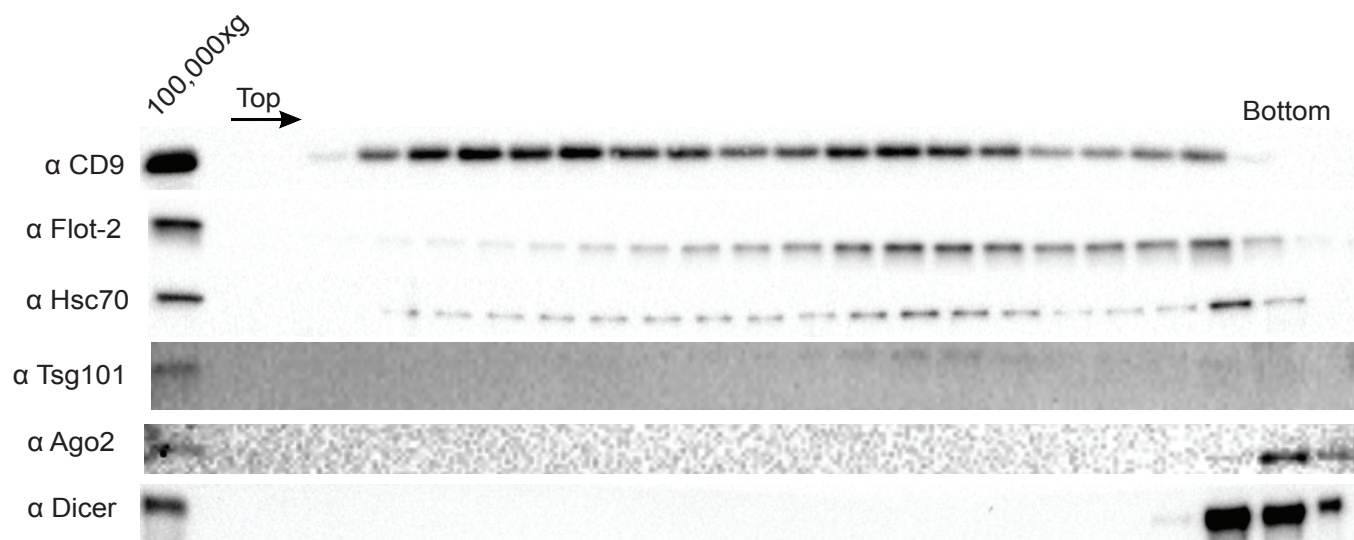

Figure 4 - figure supplement 1. Ago2 and Dicer are not sEV-associated in MB-MDA-231 cells.

Supplement: supp [file elife-47544-supp-v1.zip › elife_poa_e47544_Figure_4_figure_supplement_1.pdf]
